# Supplementary material for: Data Resource Profile: thousands of circulating RNA profiles of pre-clinical samples from the Janus Serum Bank Cohort
Source: bioRxiv or medRxiv preprint supplement (doi:10.1101/2021.01.22.20243154), 2021-01-26
Supplement: Supplementary file [file media-1.pdf]

**Supplementary Table of the Sequencing Data**

| Cancer site ICD 10                               | Men (n=)                 |                          |                          |                          |                         |                         |                          | TOT               |
|--------------------------------------------------|--------------------------|--------------------------|--------------------------|--------------------------|-------------------------|-------------------------|--------------------------|-------------------|
|                                                  | Lung (C33-34)            | Colon (C18)              | Rectum (C19-20)          | Gall bladder (C23)       | Prostate (C61)          | Testis (C62)            | Contr -                  |                   |
| No of individuals                                | 270                      | 162                      | 118                      | 7                        | 332                     | 84                      | 402                      | 1375              |
| No of samples                                    | 382                      | 231                      | 183                      | 7                        | 450                     | 84                      | 405                      | 1742              |
| Missing data                                     | 4                        | 6                        | 5                        | 0                        | 9                       | 4                       | 4                        | 32                |
| RNA-seq read counts in Million mean (sd) max-min | 18.6 (6.2) 85.5-0.4      | 18.3 (5.7) 48.1-0.4      | 18.2 (5.1) 31.4-0        | 20.7 (2.9) 25.2-17.7     | 17.2 (3.6) 29.1-0.2     | 18.5 (5.3) 40.2-0.1     | 17.5 (5) 42.1-0          | 17.9 (5.2) 85.5-0 |
| miRNA counts                                     | 284.8 (87.7) 609-103     | 285.2 (77.3) 562-119     | 294.1 (92.9) 546-2       | 292.4 (98.3) 418-169     | 287.2 (88.8) 502-21     | 347.2 (91.5) 582-2      | 294.4 (93) 568-5         |                   |
| isomiR counts                                    | 2379.9 (1397.5) 9159-360 | 2278.7 (1151) 7958-518   | 2522.7 (1418.8) 8906-2   | 2065 (1205.3) 3590-638   | 2344.2 (1251.9) 7028-86 | 2952.6 (1320) 7616-2    | 2455.3 (1374.8) 8639-9   |                   |
| piRNA counts                                     | 558.4 (147.5) 1216-284   | 542.9 (132) 1017-302     | 531 (141.6) 1053-25      | 511.3 (100) 676-368      | 448 (75.2) 713-108      | 568.7 (133.3) 967-21    | 531.9 (127) 1015-38      |                   |
| snoRNA counts                                    | 197.6 (67.7) 484-46      | 186.1 (59.8) 408-65      | 189.3 (65.6) 378-5       | 182.1 (56.3) 268-113     | 169.6 (56.9) 396-32     | 192.2 (57.4) 315-6      | 184.5 (63.2) 436-1       |                   |
| lncRNA counts                                    | 238.1 (158.2) 919-38     | 230.9 (141.6) 752-43     | 208.7 (171.8) 1041-1     | 136.1 (34.7) 166-72      | 115.6 (54.4) 355-8      | 322.6 (168.5) 733-77    | 216.1 (138.4) 838-2      |                   |
| mRNA counts                                      | 2921.3 (1680.1) 8756-241 | 2786.1 (1520.8) 7986-356 | 2610.8 (1748.7) 9886-1   | 1843.1 (569.8) 2441-806  | 1484.5 (743.2) 4259-14  | 3919.9 (1411.3) 7345-2  | 2731.2 (1479.6) 8161-3   |                   |
| tRNA counts                                      | 410.2 (35.7) 493-244     | 409.8 (33.7) 494-246     | 406.8 (53.5) 478-19      | 438.1 (19.7) 453-396     | 407.5 (32.4) 468-95     | 395.1 (50.9) 458-18     | 404.1 (49.6) 486-33      |                   |
| tRF counts                                       | 1049.5 (439.4) 2581-175  | 1014.4 (370.4) 2450-210  | 1101.9 (461.4) 2854-3    | 937.9 (255.1) 1274-521   | 771.1 (243.2) 1565-37   | 1295 (426.5) 2148-4     | 1049.4 (446.9) 2465-8    |                   |
| Cancer site ICD 10                               | Women (n=)               |                          |                          |                          |                         |                         |                          | TOT               |
|                                                  | Lung (C33-34)            | Colon (C18)              | Rectum (C19-20)          | Gall bladder (C23)       | Breast (C50)            | Ovary (C56)             | Cont -                   |                   |
| No of individuals                                | 130                      | 146                      | 64                       | 20                       | 206                     | 88                      | 271                      | 925               |
| No of samples                                    | 177                      | 193                      | 93                       | 20                       | 395                     | 106                     | 271                      | 1255              |
| Missing data                                     | 5                        | 10                       | 6                        | 0                        | 8                       | 13                      | 2                        | 44                |
| RNA-seq read counts in Million mean (sd) max-min | 17.5 (5) 31.6-0          | 17.3 (4.9) 41.5-0.8      | 18.2 (4.8) 32.1-4.2      | 17.9 (3.7) 25.3-10.5     | 18 (3.6) 31.5-0         | 13.5 (5.9) 29.5-2.7     | 17.6 (4.3) 30.3-0.3      | 17.4 (4.6) 41.5-0 |
| miRNA counts                                     | 272.4 (84.1) 532-25      | 288.7 (86.5) 558-36      | 275.4 (86.5) 555-105     | 257 (82.5) 432-111       | 271.3 (79.7) 515-12     | 237.3 (76.9) 415-86     | 280.1 (86.3) 502-67      |                   |
| isomiR counts                                    | 2192.7 (1332.3) 9462-35  | 2431 (1433.1) 8718-92    | 2254.1 (1414.4) 8411-508 | 1917.1 (1155.9) 4465-332 | 2056.3 (1055.3) 5947-11 | 1553.8 (818.1) 4090-206 | 2210.9 (1247.2) 6483-200 |                   |
| piRNA counts                                     | 539.8 (134.2) 1078-138   | 555.8 (133.2) 1246-192   | 540 (119.9) 895-340      | 433.5 (58.4) 540-337     | 419 (68) 775-34         | 383.8 (62.6) 624-262    | 481.7 (114.8) 934-97     |                   |
| snoRNA counts                                    | 190.2 (66.2) 411-7       | 196.9 (58.9) 470-51      | 183.5 (62.8) 391-86      | 180.6 (68.5) 393-89      | 152.1 (46.6) 371-6      | 128.4 (42.1) 287-48     | 171.2 (58.5) 376-22      |                   |
| lncRNA counts                                    | 234.3 (136.3) 829-9      | 248.8 (154.7) 889-31     | 221.3 (117.4) 615-54     | 110.2 (35.9) 199-56      | 101.6 (48.3) 330-3      | 114.3 (54.7) 317-35     | 171.6 (113.5) 698-16     |                   |
| mRNA counts                                      | 2870.8 (1482.8) 7765-106 | 3046.8 (1643.7) 9859-115 | 2789.9 (1328.7) 6991-430 | 1404.8 (610.1) 2797-517  | 1289.3 (711.4) 4905-3   | 1466.1 (724) 3421-290   | 2134.7 (1383.6) 7706-51  |                   |
| tRNA counts                                      | 406.7 (44.6) 490-77      | 412.7 (37.4) 490-192     | 412 (36.7) 488-297       | 425.6 (35.6) 465-351     | 406.3 (35.6) 471-36     | 364.2 (42.2) 430-216    | 407.6 (37.9) 493-71      |                   |
| tRF counts                                       | 987.7 (426.4) 2537-29    | 1000.3 (400.9) 2273-35   | 1014 (439) 2319-277      | 804.3 (274.6) 1372-317   | 761.4 (227) 1598-7      | 440.5 (187.6) 934-69    | 901.7 (349.8) 2310-22    |                   |
